# Supplementary material for: GD2 or HER2 targeting T cell engaging bispecific antibodies to treat osteosarcoma
Source: Springer Nature journal article supplement (doi:10.1186/s13045-020-01012-y), 2020-12-01

Fig. S1.

(A)

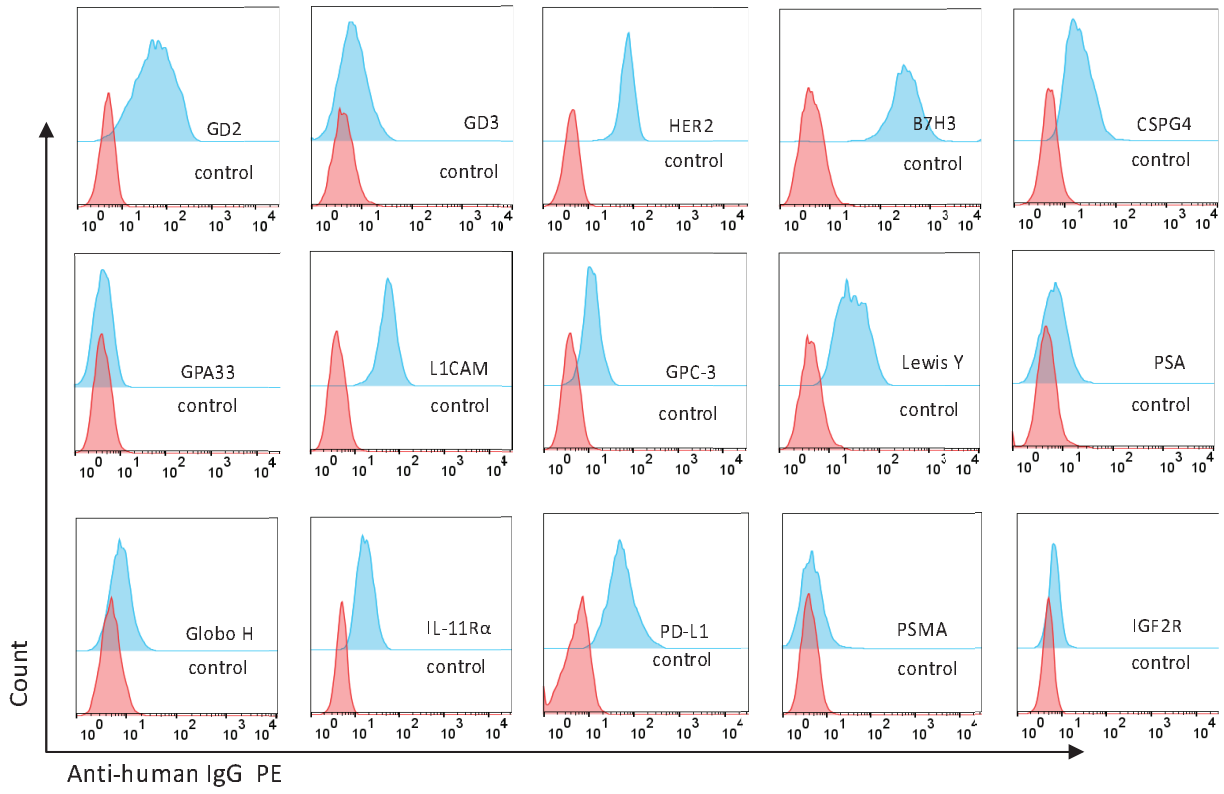

Fig. S2.

(A)

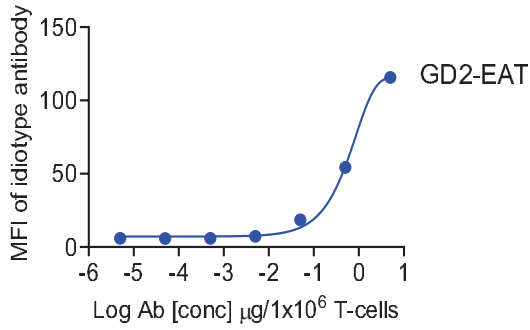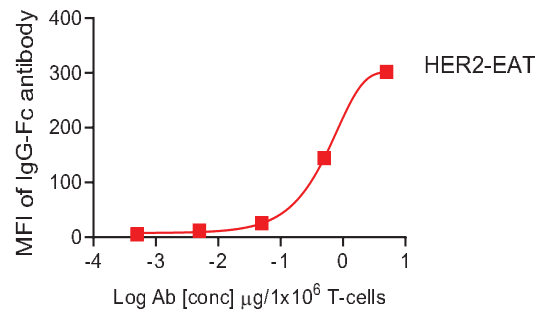

(B)

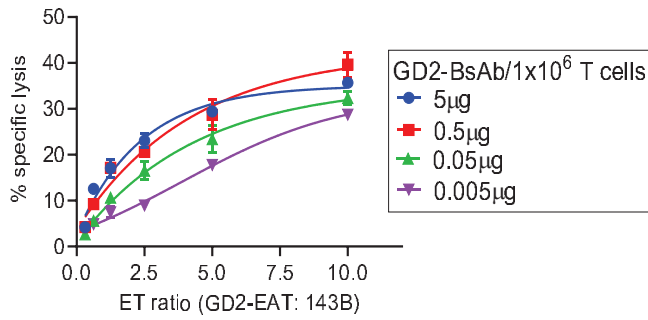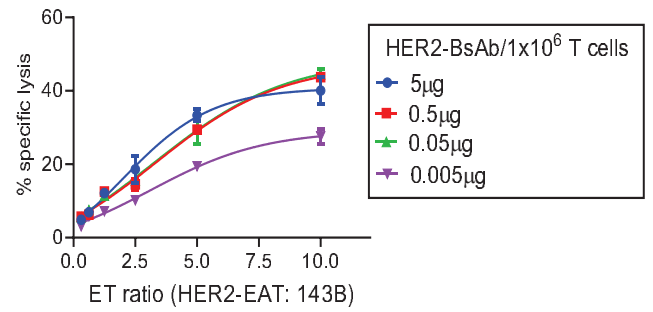

(C)

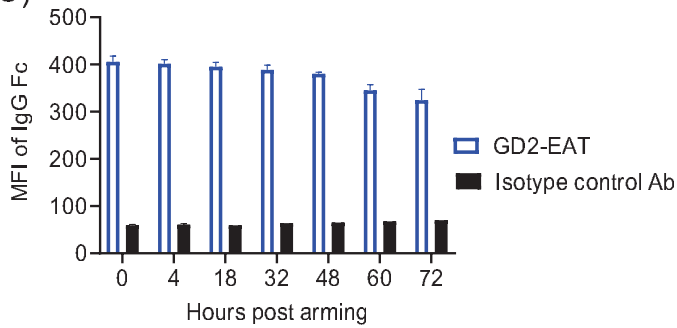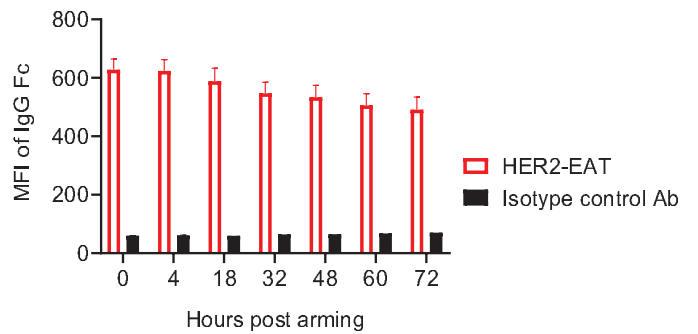

Fig. S3.

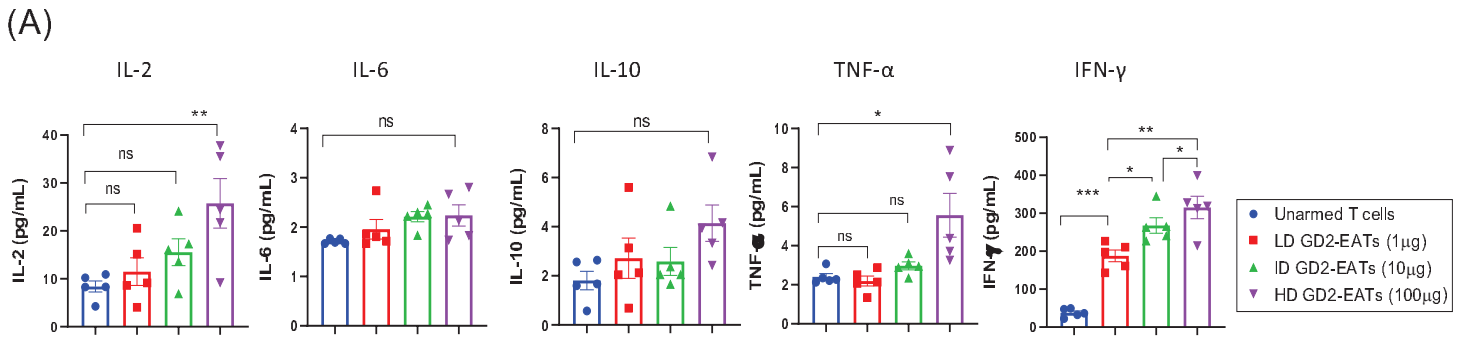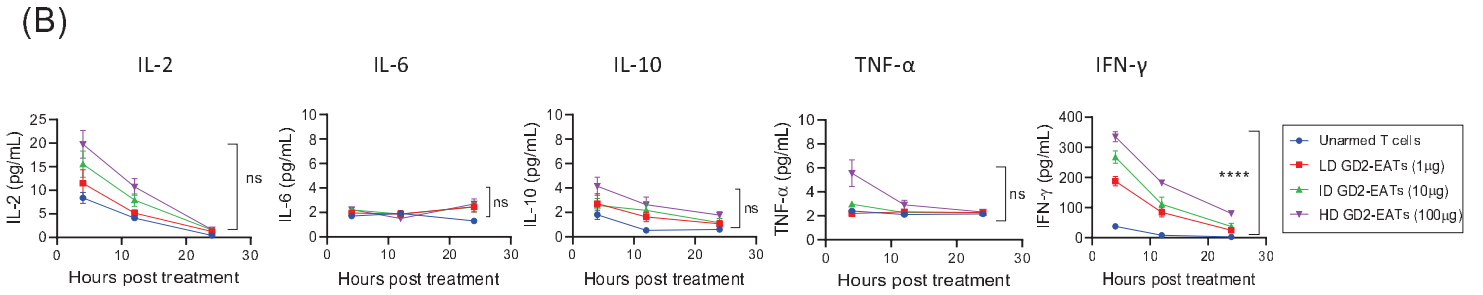

Fig. S4.

(A)

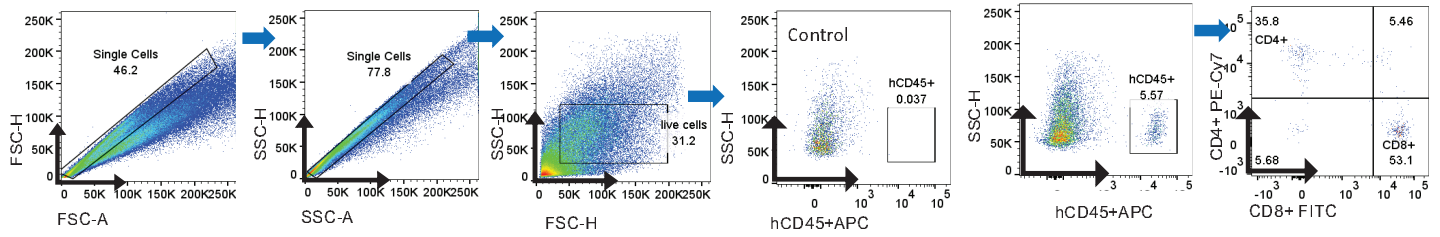

(B)

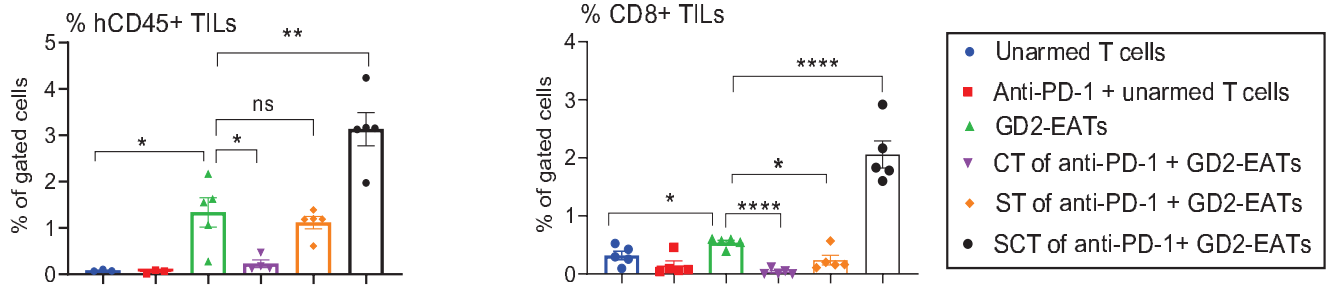

(C)

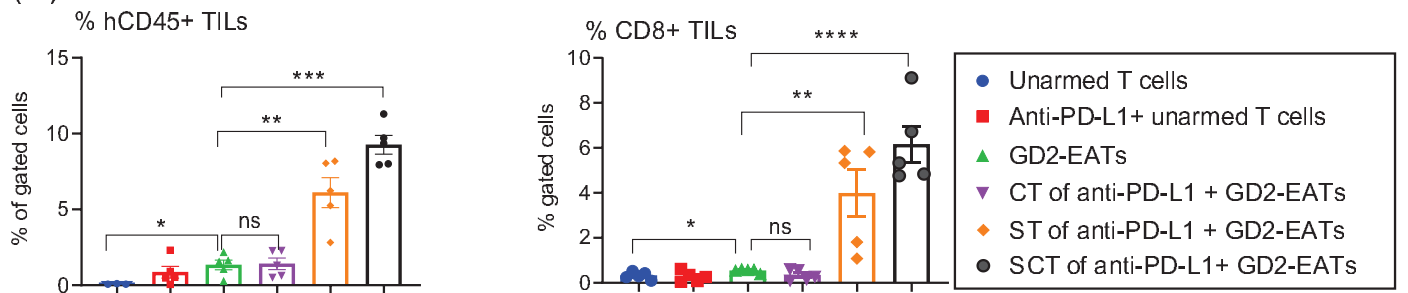

Supplement: MOESM2 [file 18673424]
